## Interchangeable functions of *Arabidopsis* PIROGI and the human WAVE complex subunit SRA1 during leaf epidermal development

Dipanwita Basu, Salah El-Din El-Assal, Jie Le, Eileen Mallery and Daniel B. Szymanski *Development* **131**, 4345-4355.

In this article, the authors reported that complementation tests between *pirogi* and *klunker* plants proved that the two genes were distinct. They have subsequently learned that the *klunker* stocks were mislabeled, and that *KLUNKER* and *PIROGI* correspond to the same gene and encode a SRA1 homologue.

The authors apologise to readers for this mistake and for any confusion caused.
